# Supplementary material
Source: MDPI journal article supplement (https://www.mdpi.com/2225-1154/11/6/122)
Supplement: s1 [file s1]

## Supplementary Information: Risky Business: Modeling the Future of Jamaica's Coffee Production in a Changing Climate

**Table S1.** Major agroecological parameters governing coffee production and their data sources.

| Agro-Ecological Parameters | Rationale                                                                                                                                                                                          | Absolute Range                 | Optimum Range                               | References                                                                                                      | Data Source                               |
|----------------------------|----------------------------------------------------------------------------------------------------------------------------------------------------------------------------------------------------|--------------------------------|---------------------------------------------|-----------------------------------------------------------------------------------------------------------------|-------------------------------------------|
| <b>Temperature</b>         | Plays an important role in plant development, especially at several critical physiological stages.                                                                                                 | 10° - 34°C                     | 14° - 28°C                                  | FAO EcoCrop; Mighty 2015; Cheserek and Gichimu 2012; Davis et al. 2012; DaMatta and Ramalho 2006; Budhlall 1986 | Meteorological Service of Jamaica         |
| <b>Rainfall</b>            | Crop grows best with intermittent months of rainfall and dry periods; dependent on predictable seasonal rainfall with good distribution. Also important for flowering, fruit setting and fruiting. | 750 - 4200 mm                  | 1400 - 2500 mm                              | FAO EcoCrop; Mighty 2015; Haggard and Schepp 2012; DaMatta and Ramalho 2006; Budhlall 1986;                     | Meteorological Service of Jamaica         |
| <b>Elevation</b>           | Maintains relationship with temperature. High altitudes allow the slow maturation of the bean which contributes to taste and quality.                                                              | 0 - 1700 m                     | 350 – 1667.67 m                             | Mighty 2015; Avelino et al. 2005                                                                                | USGS Earth Explorer                       |
| <b>Soil Type</b>           | Facilitates nutrient enrichment, root                                                                                                                                                              | Clay-siliceous soils, alluvial | Deep, well-drained soils of volcanic origin | FAO EcoCrop; Mighty 2015; van der Vossen,                                                                       | National Spatial Data Management Division |

|                |                                                                                                                   |                                                   |                                      |                                    |                                           |
|----------------|-------------------------------------------------------------------------------------------------------------------|---------------------------------------------------|--------------------------------------|------------------------------------|-------------------------------------------|
|                | development, yield, and unique flavour profile                                                                    | soils, volcanic soils                             |                                      | Bertrand and Charrier 2015         |                                           |
| <b>Soil pH</b> | Facilitates nutrient enrichment and contributes to a unique flavour profile                                       | 4.3 - 8.4 (moderately acidic-moderately alkaline) | 5.5 - 7 (slightly acidic to neutral) | FAO EcoCrop; Mighty 2015           | National Spatial Data Management Division |
| <b>Slope</b>   | Gently sloped areas at high elevations facilitate easy growth                                                     | 0° - 35°                                          | 0° - 35°                             | Budhlall 1986                      | Derived from elevation dataset            |
| <b>Aspect</b>  | Crop grown on slopes are exposed to varying amounts of light intensity which influences growth, taste and quality | North, South and West facing slopes               | North and South facing slopes        | Avelino et al. 2005; Budhlall 1986 | Derived from elevation dataset            |

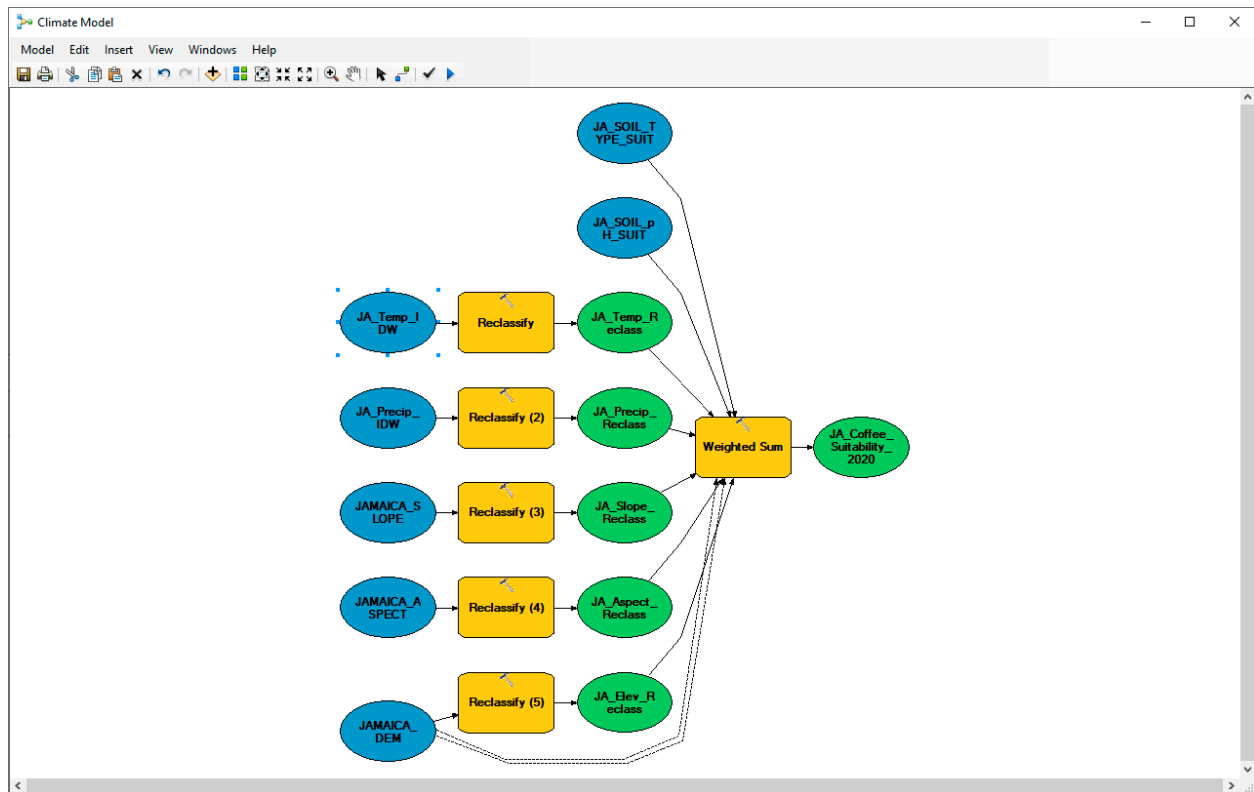

**Figure S1.** ModelBuilder representation of steps taken to execute the base 2020 coffee suitability model.

Almazroui et al. (2021) base period = 1995-2014

Our base period = 1970 - 2020

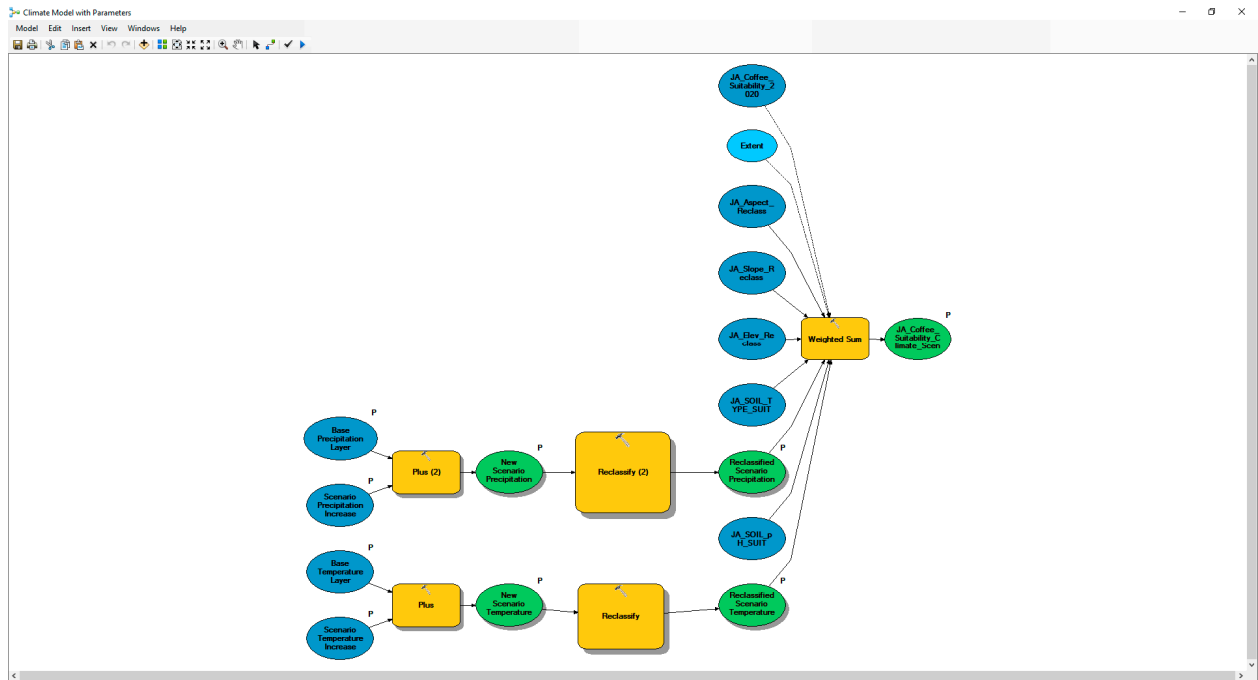

**Figure S2.** ModelBuilder representation of steps taken to execute temperature and precipitation changes for the various coffee climatic suitability scenarios.

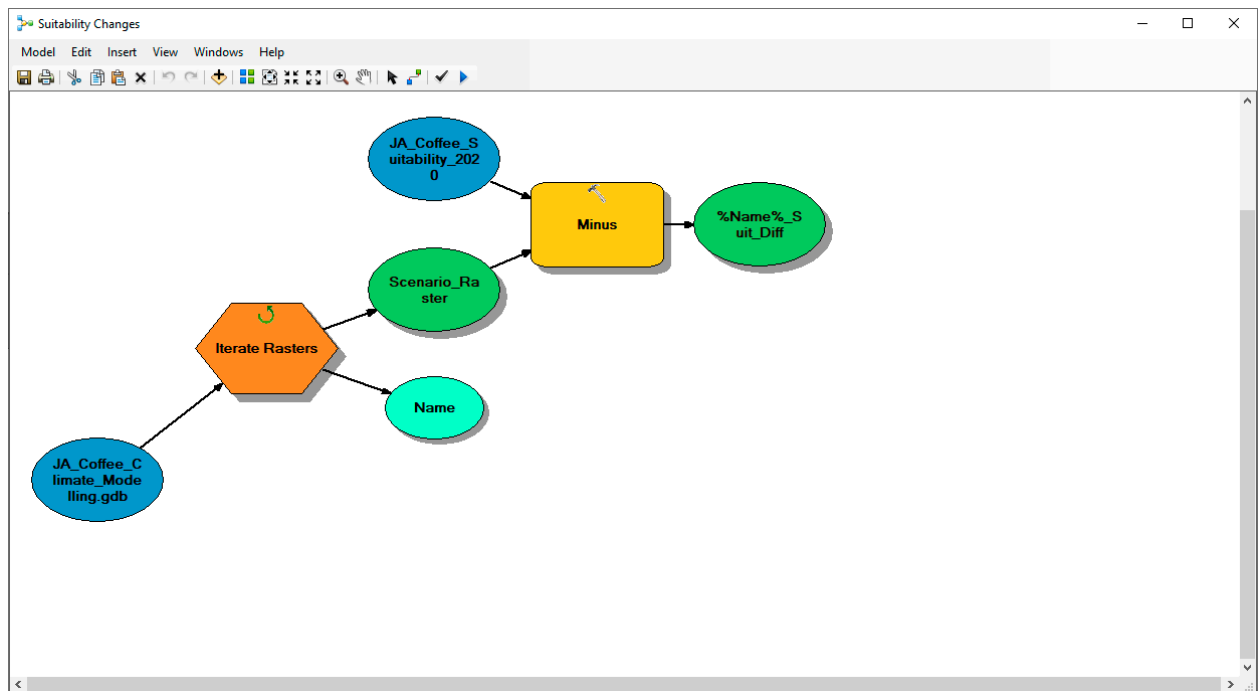

**Figure S3.** ModelBuilder representation of iterator used to calculate changes in coffee suitability due to impacts of temperature and precipitation.

## Coffee Climate Suitability Changes: 2021-2040

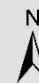

Original Coffee Suitability Model - 2020

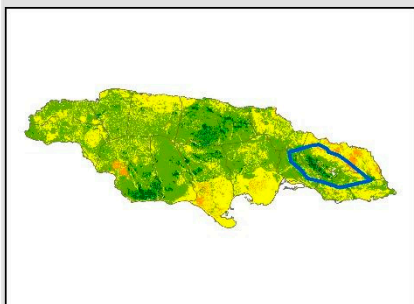

Coffee Suitability - SSP1 2.6 2021-2040

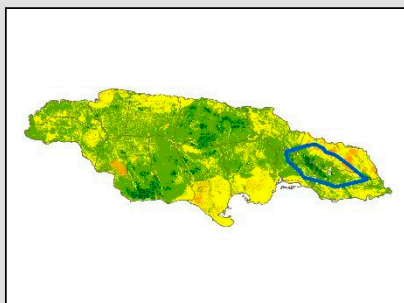

### Legend

- BLUE MOUNTAIN COFFEE REGION
- JAMAICA PARISH BOUNDARIES

### Coffee Suitability Model Ranges

- 1.960000038 - 2.51
- 2.510000001 - 3.06
- 3.060000001 - 3.61
- 3.610000001 - 4.16
- 4.160000001 - 4.72

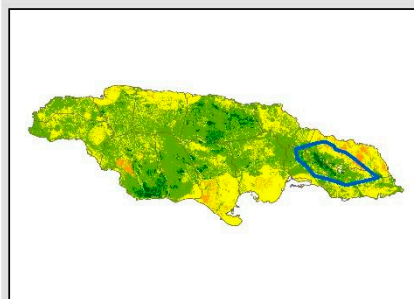

Coffee Suitability - SSP2 4.5 2021-2040

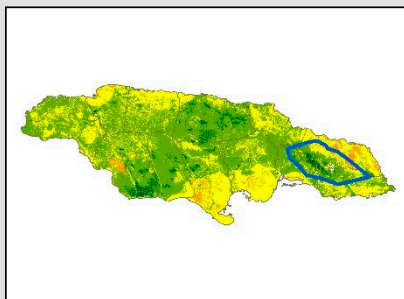

Coffee Suitability - SSP5 8.5 2021-2040

0 25 50 100 150 200  
Kilometers

Date Created : April 3, 2023  
Map Projection: WGS 1984

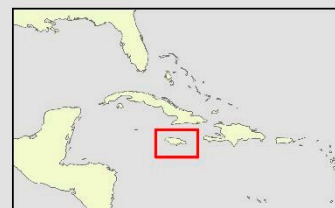

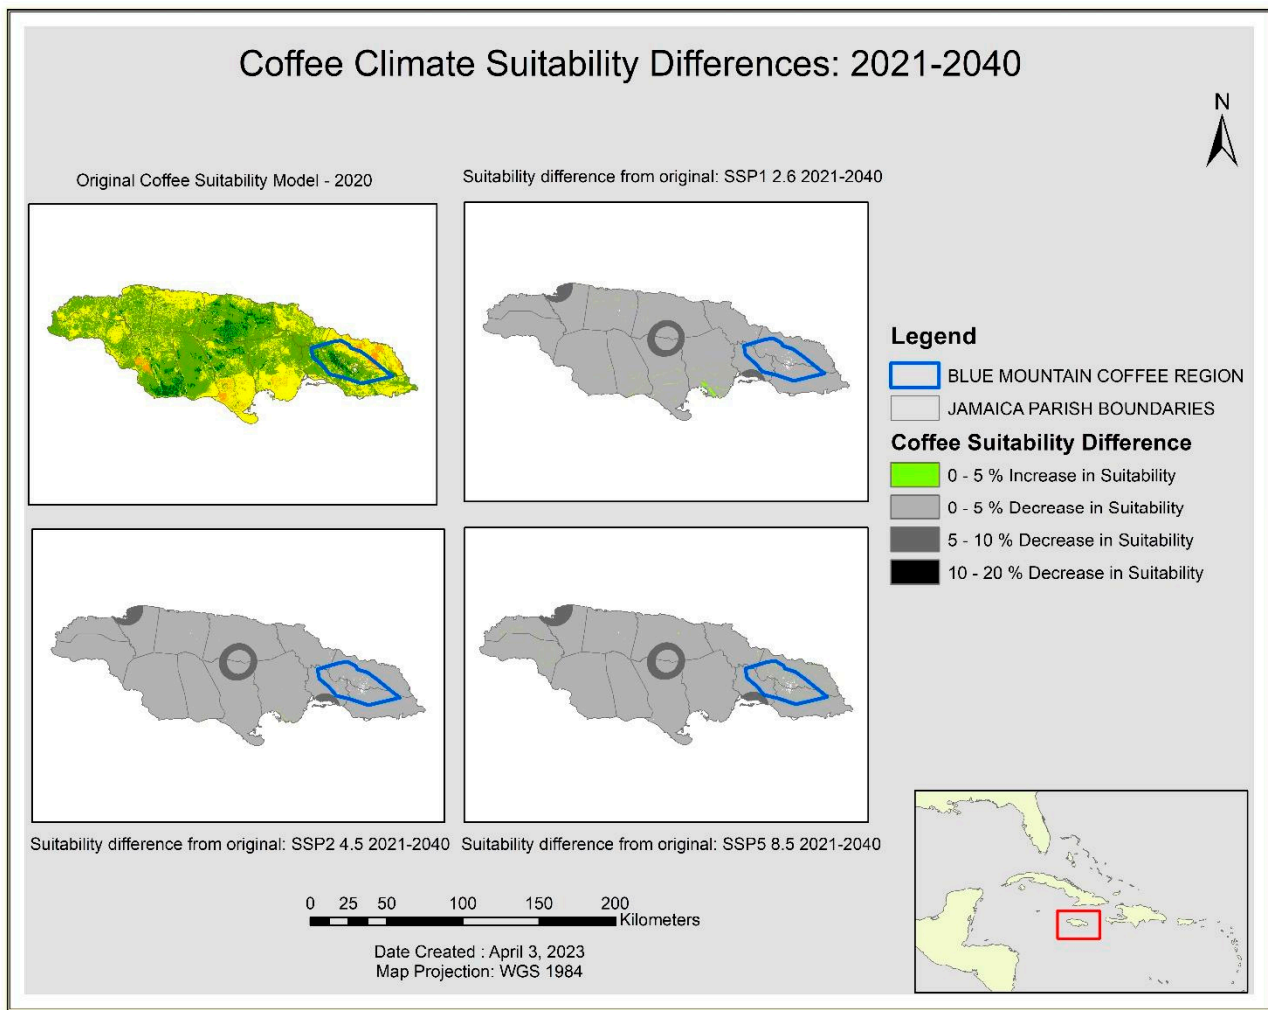

B

**Figure S4.** Changes in coffee suitability due to climate change for 2021-2040. A: Suitability models for each SSP scenario. B: Differences in suitability from the original suitability model for 2020.

# Coffee Climate Suitability Changes: 2041-2060

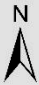

Original Coffee Suitability Model - 2020

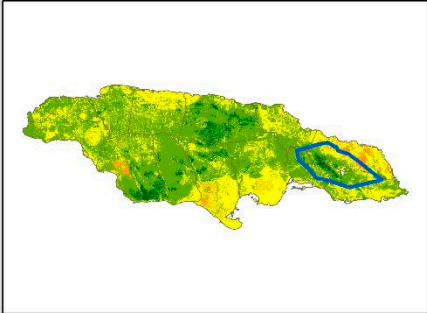

Coffee Suitability - SSP1 2.6 2041-2060

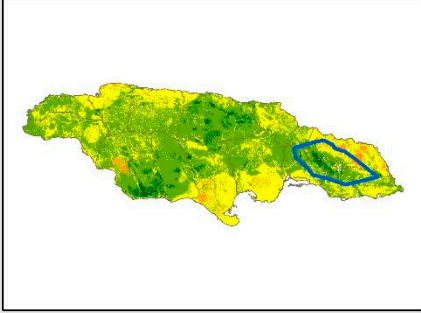

**Legend**

- BLUE MOUNTAIN COFFEE REGION
- JAMAICA PARISH BOUNDARIES

**Coffee Suitability Model Ranges**

- 1.960000038 - 2.51
- 2.510000001 - 3.06
- 3.060000001 - 3.61
- 3.610000001 - 4.16
- 4.160000001 - 4.72

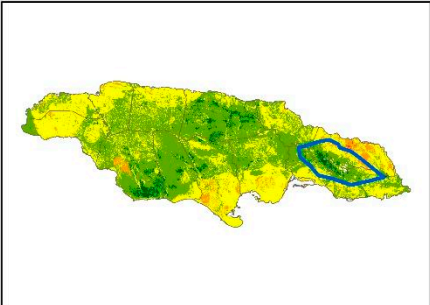

Coffee Suitability - SSP2 4.5 2041-2060

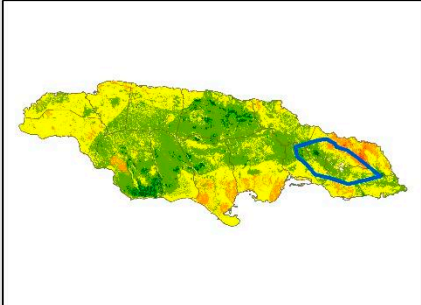

Coffee Suitability - SSP5 8.5 2041-2060

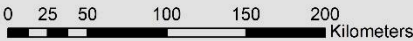

Date Created : April 3, 2023  
Map Projection: WGS 1984

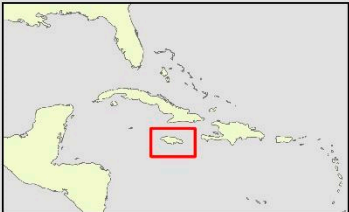

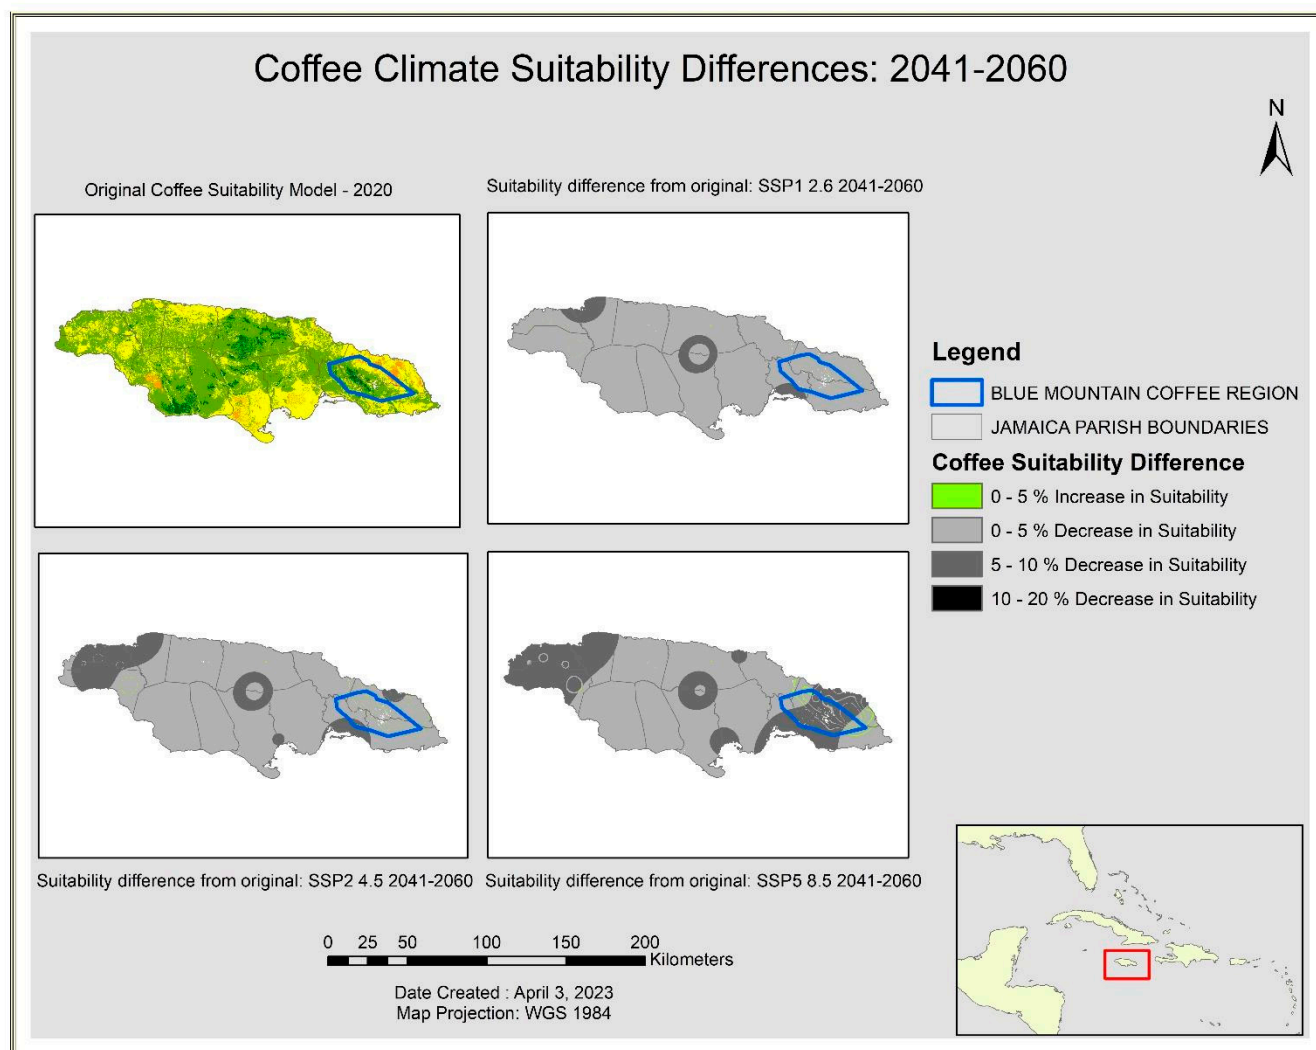

B

**Figure S5.** Changes in coffee suitability due to climate change for 2041-2060. A: Suitability models for each SSP scenario. B: Differences in suitability from the original suitability model for 2020.



# Coffee Climate Suitability Changes: 2081-2100

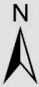

Original Coffee Suitability Model - 2020

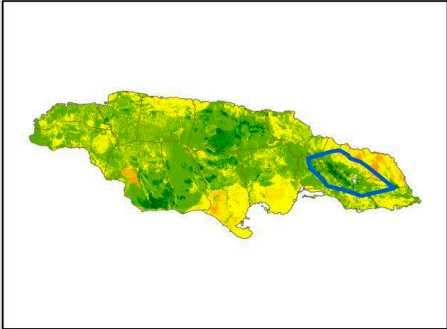

Coffee Suitability: SSP1 2.6 2081-2100

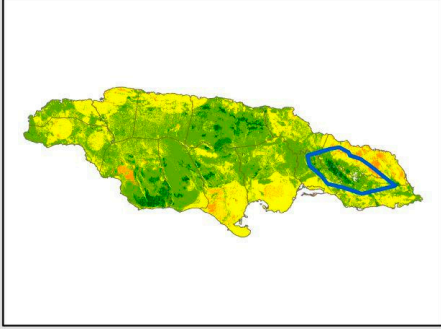

**Legend**

- BLUE MOUNTAIN COFFEE REGION
- JAMAICA PARISH BOUNDARIES

**Coffee Suitability Model Ranges**

- 1.960000038 - 2.51
- 2.510000001 - 3.06
- 3.060000001 - 3.61
- 3.610000001 - 4.16
- 4.160000001 - 4.72

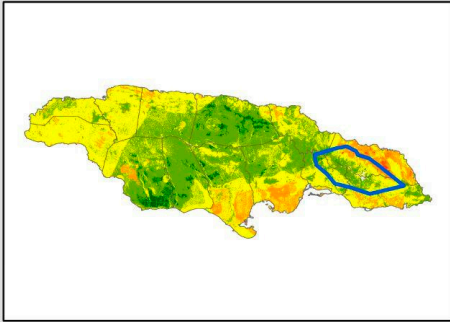

Coffee Suitability: SSP2 4.5 2081-2100

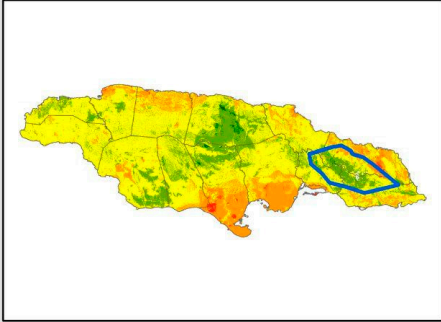

Coffee Suitability: SSP5 8.5 2081-2100

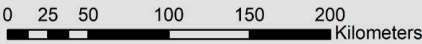

Date Created : April 3, 2023  
Map Projection: WGS 1984

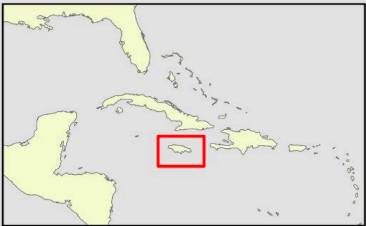

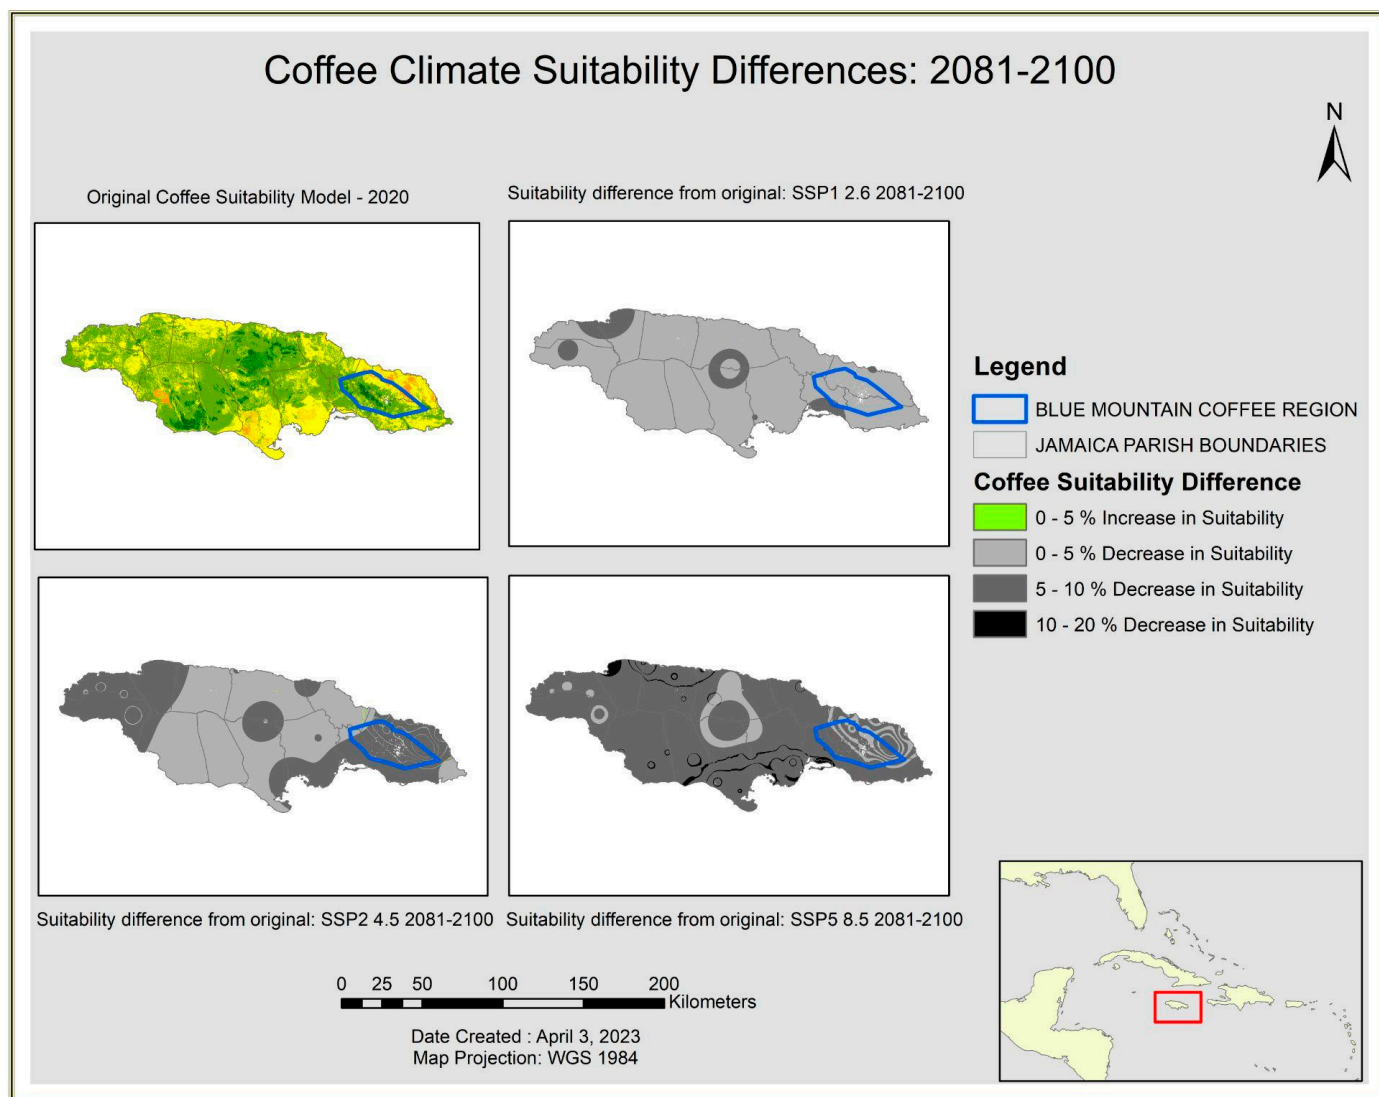

B

**Figure S6.** Changes in coffee suitability due to climate change for 2081-2100. A: Suitability models for each SSP scenario. B: Differences in suitability from the original suitability model for 2020.

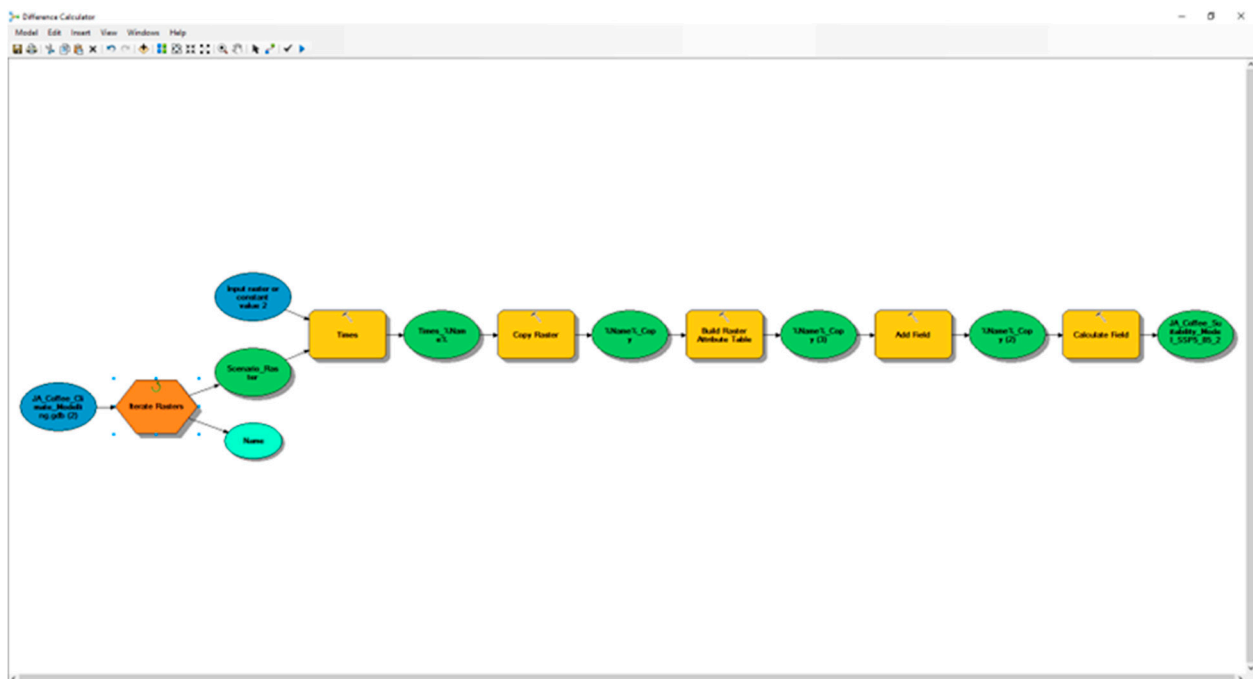

**Figure S7.** ModelBuilder representation of iterator used to calculate differences in coffee suitability vs. 2020 base model.

## Location of Temperature Stations in Jamaica

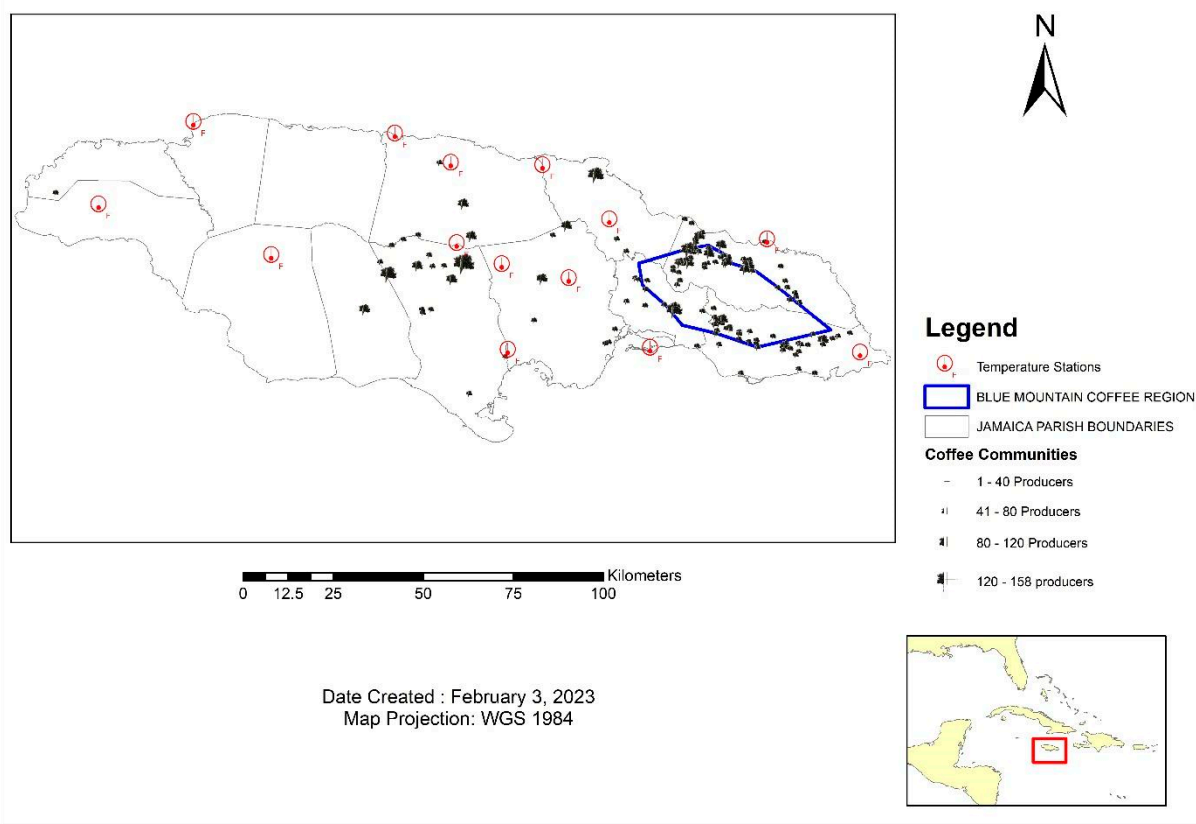

**Figure S8.** Spatial distribution of temperature measurement stations across the island of Jamaica.
